# Supplementary material
Source: bioRxiv or medRxiv preprint supplement (https://www.biorxiv.org/highwire/filestream/83966/field_highwire_adjunct_files/0/272757-1.pdf)
Supplement: Supplementary file [file 272757-1.pdf]

## 1 **Supplementary Note**

### 3 Correlations of pollen number with 107 published datasets, climatic variables, and *S*-haplogroups

4 We analyzed the correlation of our data for pollen number per flower with the dataset of  
5 107 published phenotypes, which includes diverse phenotypes of flowering and defense-related  
6 ionomics and developmental phenotypes, but not the numbers of ovules, flowers, or seeds. We  
7 found no significant correlations after performing Bonferroni correction for multiple testing (see  
8 main text). When multiple testing was not considered, seven traits showed a correlation ( $P <$   
9 0.05). Among these, “fresh weight of plants” and “dry weight of plants” (“75\_FW” and  
10 “76\_DW”, respectively, in Extended Data Table 4) were positively correlated with pollen  
11 number per flower. This suggests that larger plants produce more pollen per flower, which is  
12 consistent with empirical observations. Because plant size was measured mostly before  
13 flowering and the generation of pollen grains, these data do not suggest that larger plant size is a  
14 consequence of a larger number of pollen grains.

15 We also examined whether pollen number was associated with *S*-haplotypes (haplogroups  
16 A, B, or C) (19). Because self-compatibility has been shown to have evolved independently in  
17 each haplogroup, it may be possible that different alleles are responsible for reduced pollen  
18 numbers. However, no significant correlation was found ( $P = 0.682$ ; ANOVA; Table S8).

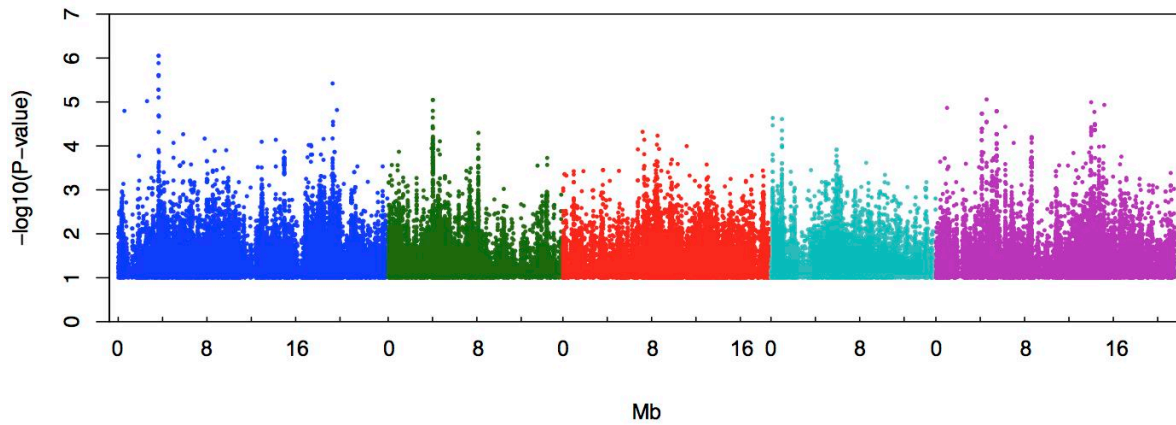

20  
21  
22  
23  
24  
25

**Extended Data Figure 1. Genome-wide association study of ovule number using 151 worldwide accessions (Extended Data Table 3).** The five chromosomes are depicted in different colors. SNPs with a minor allele frequency  $> 0.15$  are shown.

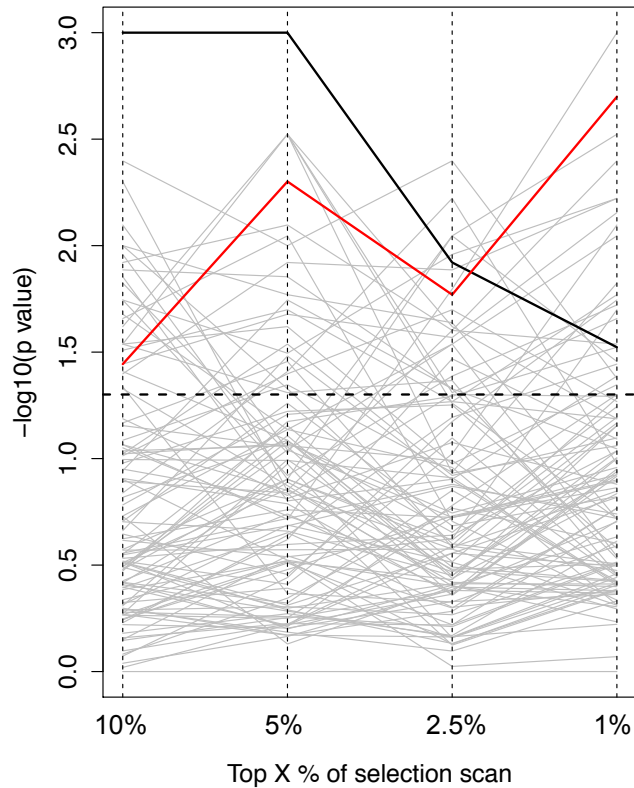

26

27 **Extended Data Figure 2. P-values of the iHS enrichment analysis based on permutation**  
 28 **tests (Fig. 1j).** Each line indicates a phenotype (red: pollen number, black: ovule number, gray:  
 29 107 phenotypes reported in (18). The X-axis quantifies the extreme tails of the iHS statistic. A  
 30 horizontal dashed line indicates the threshold of  $P = 0.05$ . Note that the minimum  $P$ -value is  
 31 0.001 because permutation was performed 1,000 times (see method).

32

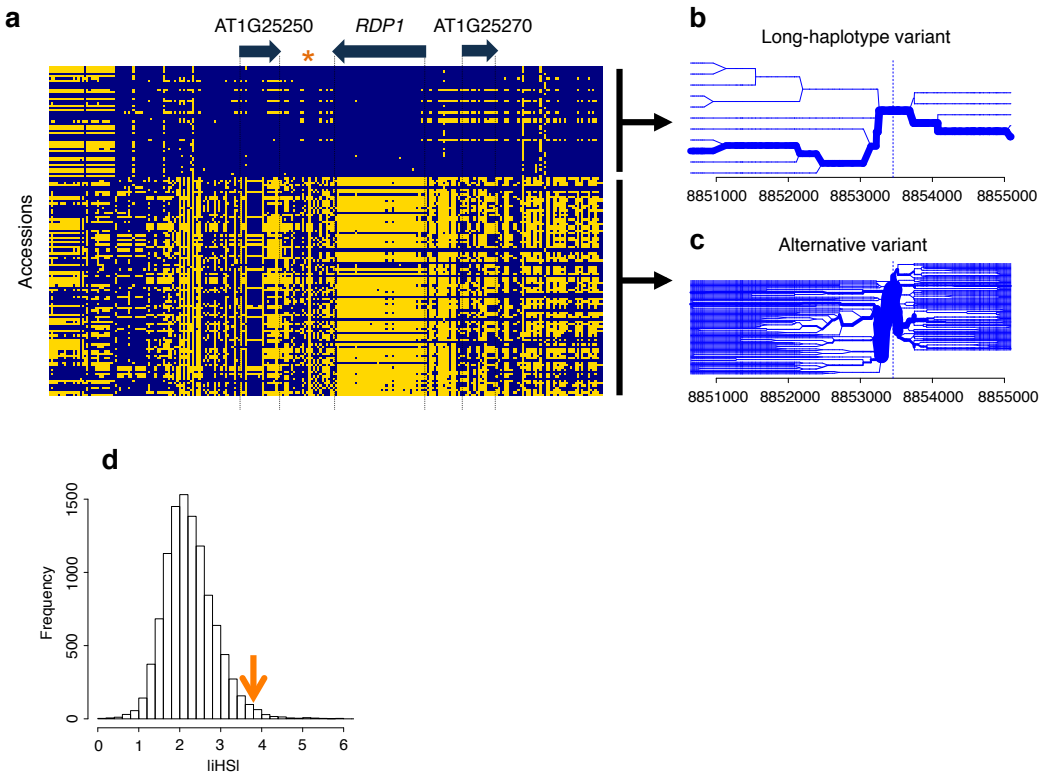

33  
 34 **Extended Data Figure 3. A signature of selection at the *RDP1* region.** (a) A haplotype map  
 35 of 144 accessions at the *RDP1* region. Accessions were sorted by SNP “1-8853454” (asterisk)  
 36 that showed the strongest iHS signal in the 10-kb window encompassing *RDP1*. Yellow and blue  
 37 dots indicate polymorphisms. (b, c) Haplotype bifurcation diagrams for the long haplotype (b)  
 38 and the alternative variants (c) in the *RDP1* region. Line width corresponds to the number of  
 39 individuals with the indicated haplotype. (d) Genome-wide distribution of the absolute values of  
 40 the iHS statistics. The *RDP1* region is in the upper tail of the distribution (arrow, empirical  $P =$   
 41 0.0149).  
 42

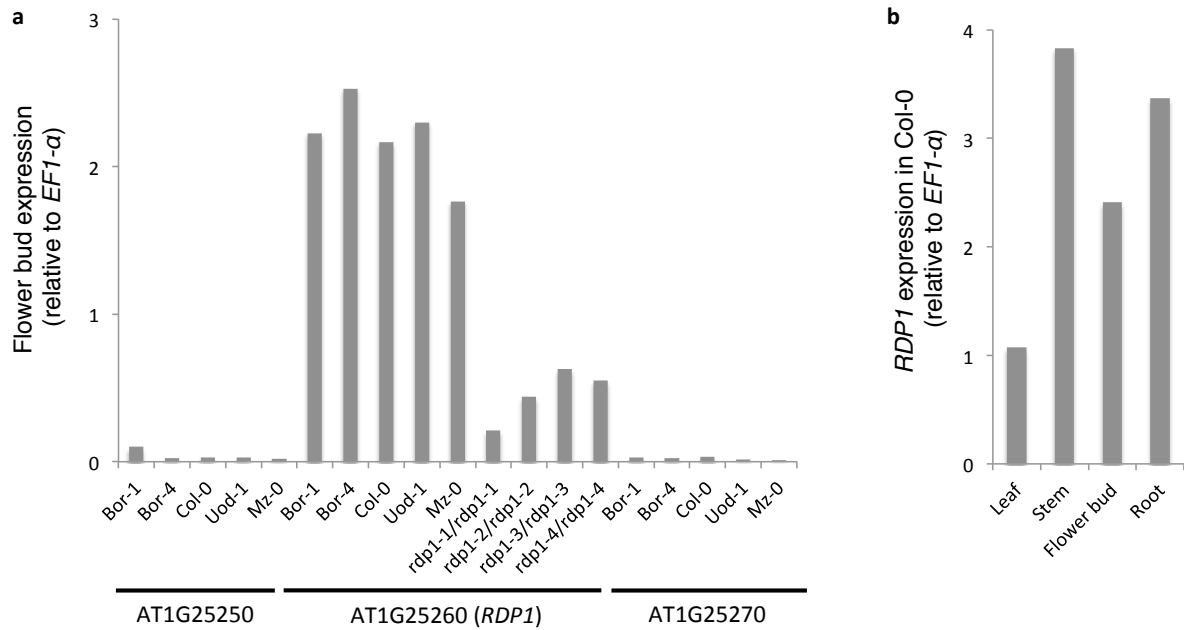

43  
44  
45  
46  
47  
48  
49

**Extended Data Figure 4. Expression levels of *RDP1* and neighboring genes.** (a) Flower bud expression of *RDP1* and neighboring genes (*AT1G25250* and *AT1G25270*) in natural accessions and mutants. (b) Expression levels of *RDP1* in leaf, stem, flower bud, and root of the Col-0 accession. Gene expression levels were normalized to *EF1-α* (*AT5G60390*).

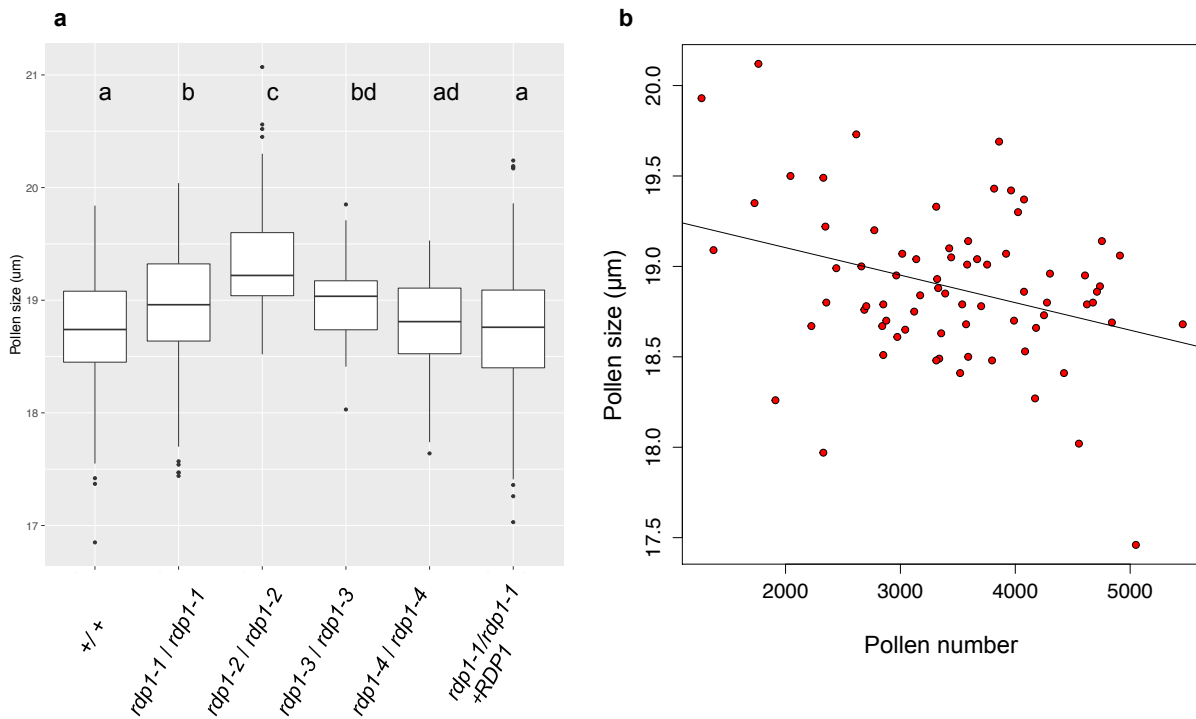

51  
 52 **Extended Data Figure 5. Pollen size in *RDP1* mutants and its correlation with pollen**  
 53 **number. (a)** Pollen size differences between four types of homozygous mutants (wild type (+/+),  
 54 N = 135; *rdp1-1/rdp1-1*, N = 132; *rdp1-2/rdp1-2*, N = 45; *rdp1-3/rdp1-3*, N = 40; and *rdp1-*  
 55 *4/rdp1-4*, N = 60), and the lines complemented with the Col-0 allele (*rdp1-1/rdp1-1+RDP1*, N =  
 56 411). Letters (a–d) indicate significant differences in pollen number or size between lines,  
 57 determined by a nested analysis of variance and *post hoc* Tukey test ( $P < 0.05$ ). **(b)** Pollen size is  
 58 negatively correlated with pollen number in the Col-0 accession (N = 73,  $P = 0.00501$ ). This  
 59 negative correlation may be attributed to developmental constraints (16).  
 60

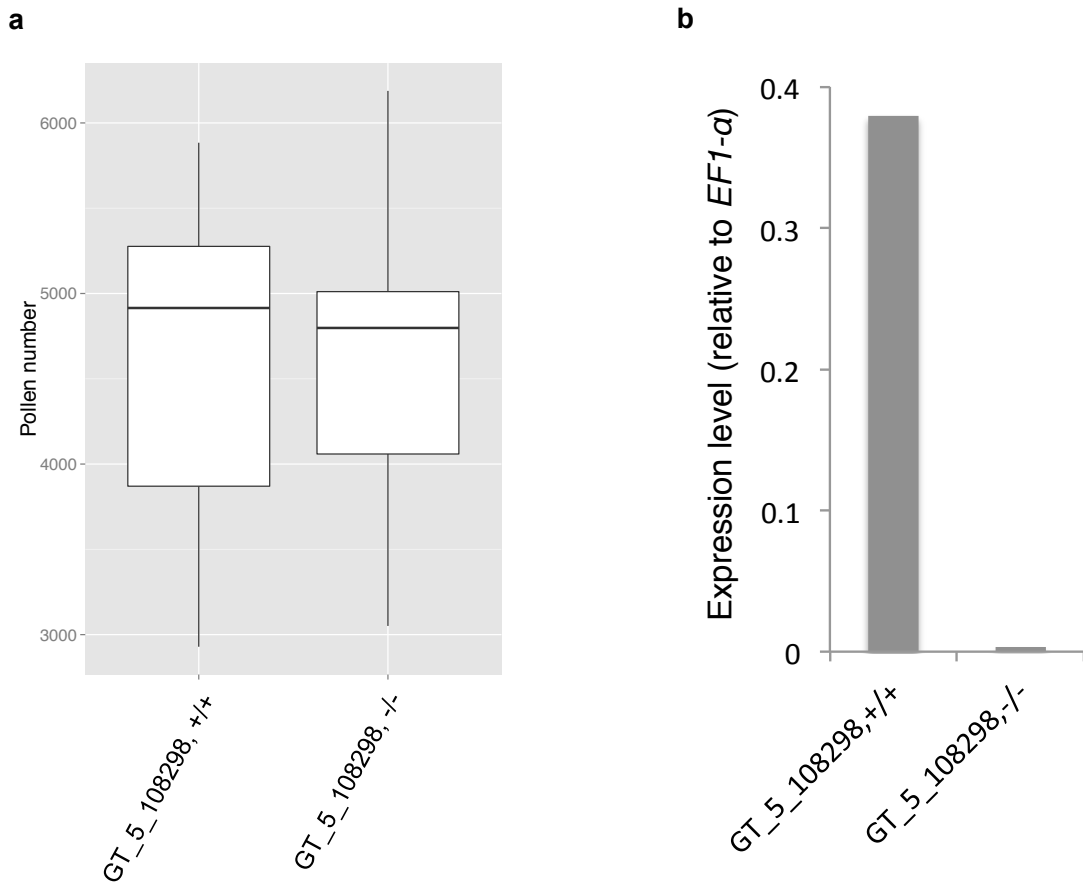

61  
 62 **Extended Data Figure 6. Function and expression of *ATIG25250*, a neighboring gene of**  
 63 ***RDPI*.** The GT\_5\_189298 T-DNA insertion line has a Ler-0 background, in which *ATIG25250*  
 64 is relatively highly expressed compared with other natural accessions. **(a)** Pollen number did not  
 65 differ significantly between the +/+ (“GT\_5\_108298, +/+”, N = 30) and the homozygous mutant  
 66 (“GT\_5\_108298, -/-”, N = 19,  $P = 0.880$ ,  $t$  test). **(b)** Reduced expression level in flower buds of  
 67 the mutant (relative to *EF1-α*) compared with the wild type.  
 68

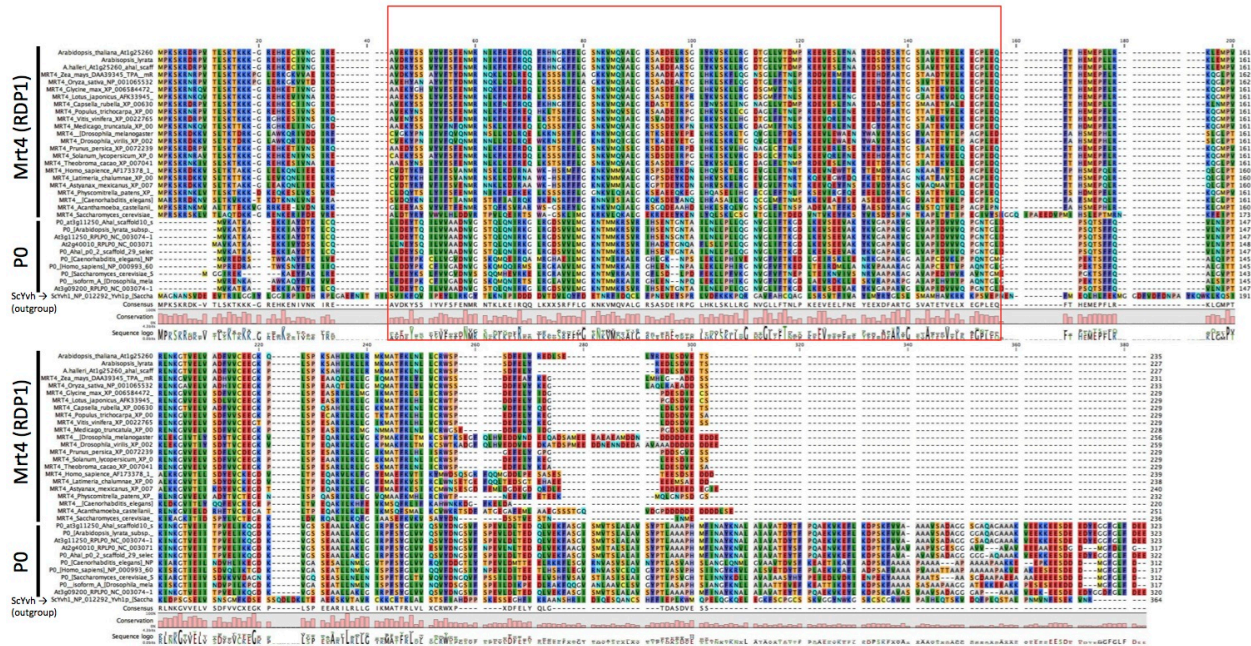

70  
 71  
 72  
 73  
 74

**Extended Data Figure 7. Alignment of Mrt4 (RDP1) and P0 protein sequences generated by ClustalW. The phylogenetic tree (Extended Data Figure 8) was generated using the aligned region indicated by the red box (44–153 aa).**



75  
76  
77

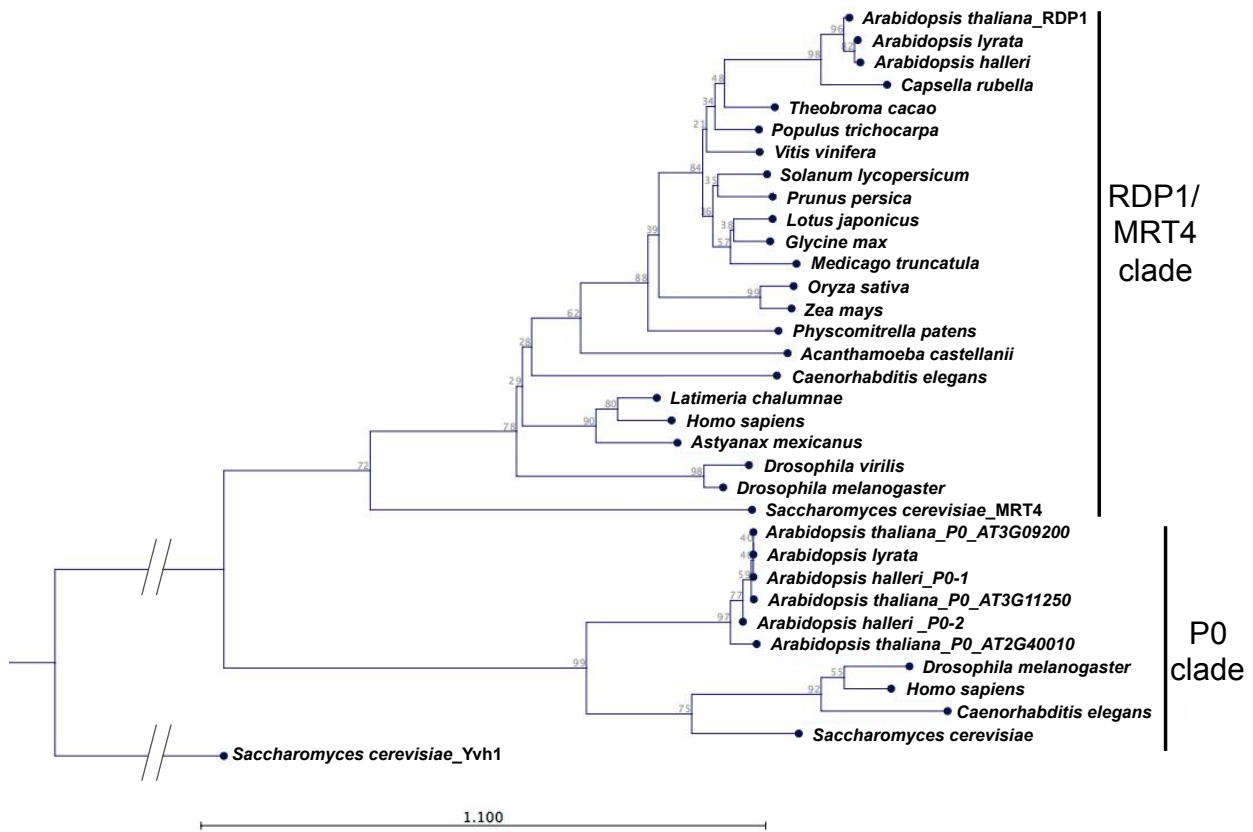

78  
79  
80  
81  
82  
83

**Extended Data Figure 8. Phylogenetic tree of RDP1/Mrt4 and P0.** Phylogenetic tree was constructed by using the neighbor-joining method with Kimura distance. Values on the branches indicate the percentage of 1,000 bootstrap replicates. See Extended Data Figure 7 for the alignment used for this tree. ScYvh1 was used as an outgroup.

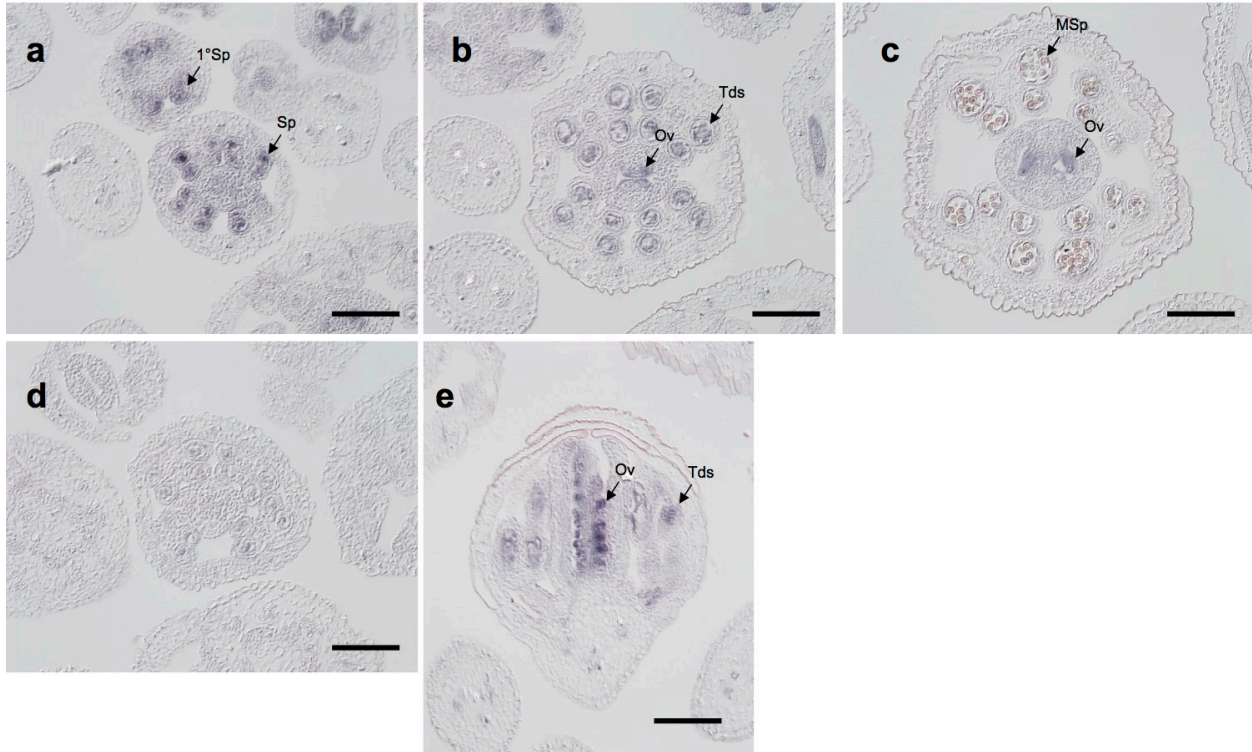

84  
85  
86  
87  
88  
89  
90  
91  
92  
93

**Extended Data Figure 9. *In situ* hybridization analysis of *RDPI* expression in *Col-0* with *RDPI* antisense (a, b, c, e) or sense (d) probes.** Transverse (a–d) and longitudinal (e) cross sections of the flower buds. *RDPI* expression was detected at the early stages of pollen lineage (primary sporogenous layer (a; 1°Sp in stage 7 flowers), sporogenous cell (a; Sp in stage 8 flowers), and tetrad (b, e; Tds in stage 10 flowers), but not in the microspore (c; MSP in stage 11 flowers). *RDPI* expression was also detected in stage 10 and 11 ovules (b, c, e; Ov). Scale bars; 100  $\mu$ m.

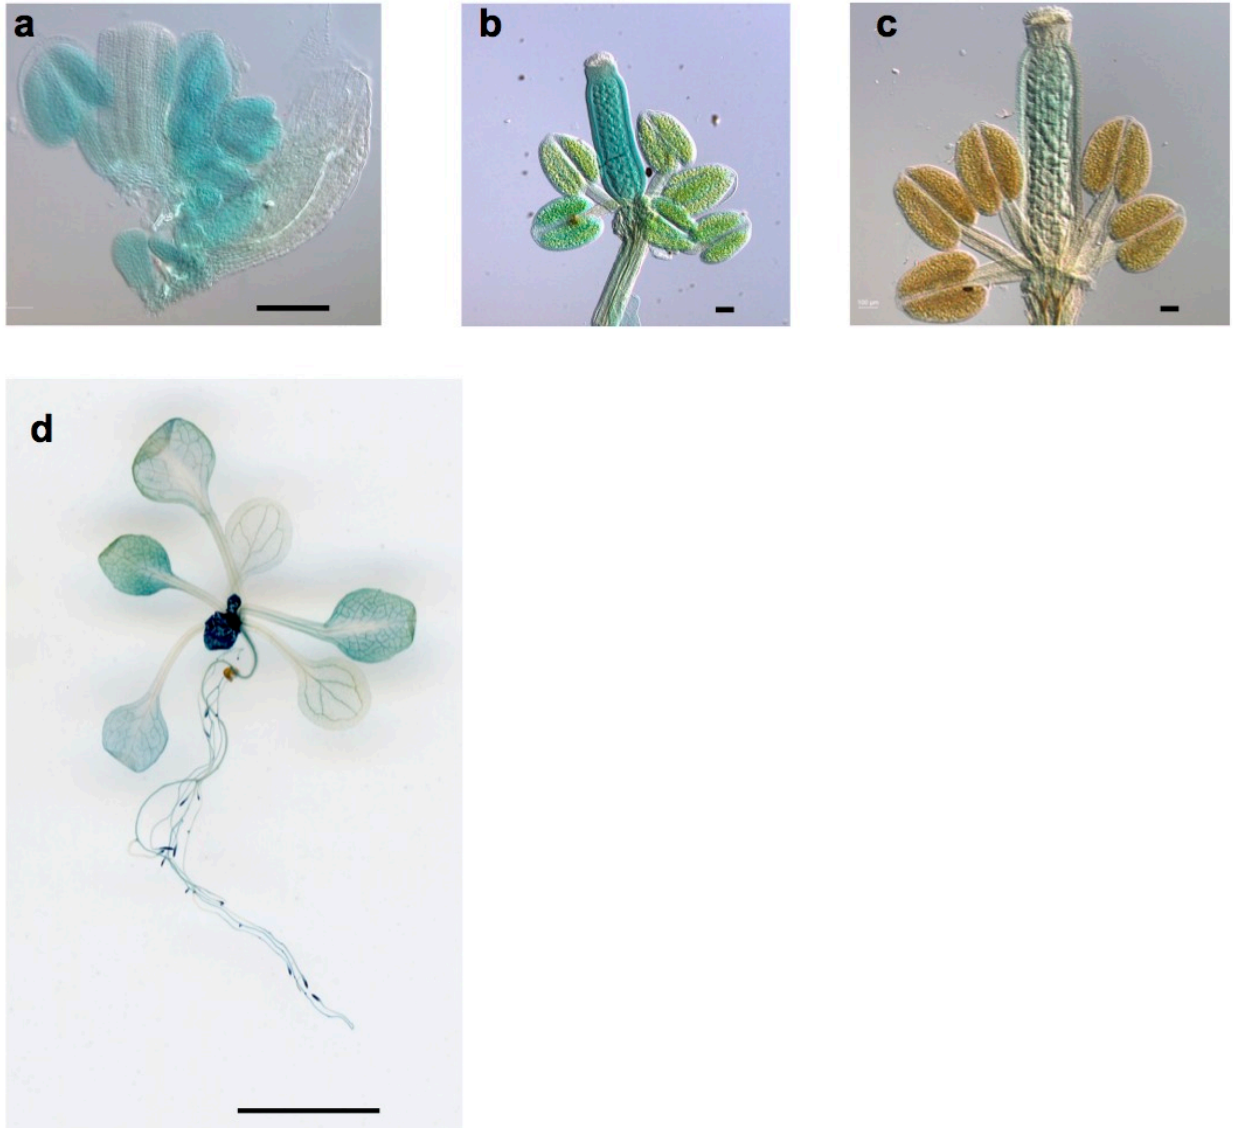

95

96

97

98

99

100

**Extended Data Figure 10.  $\beta$ -Glucuronidase (GUS) staining of pistil and stamens with *RDPI::GUS* at stage 9 (a), 11 (b), 13 (c), and seedling (d). Scale bars: 100  $\mu$ m for a–c, 5 mm for d. *RDPI* expression was preferentially detected in young stamens (a), in pistils (b), and in shoot and root apical meristems and young leaves (d).**

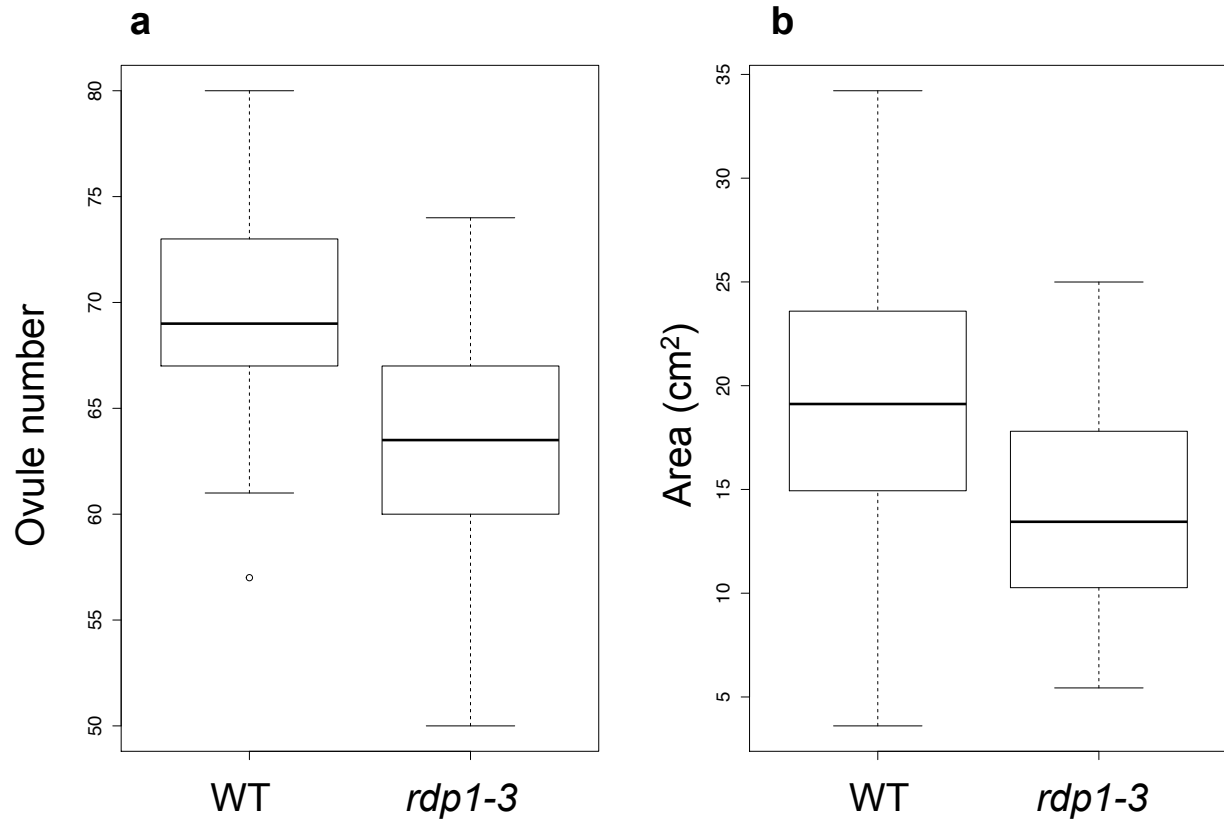

101  
 102  
 103  
 104  
 105  
 106

**Extended Data Figure 11. Pleiotropy of *rdp1-3*.** (a) Ovule number per flower was reduced in *rdp1-3* (N = 42, +/+; N = 53, *rdp1-3/rdp1-3*; *t* test,  $P = 2.34 \times 10^{-8}$ ). (b) Rosette area was smaller in *rdp1-3* (N = 49, +/+; N = 27, *rdp1-3/rdp1-3*; *t* test,  $P = 0.000986$ ).

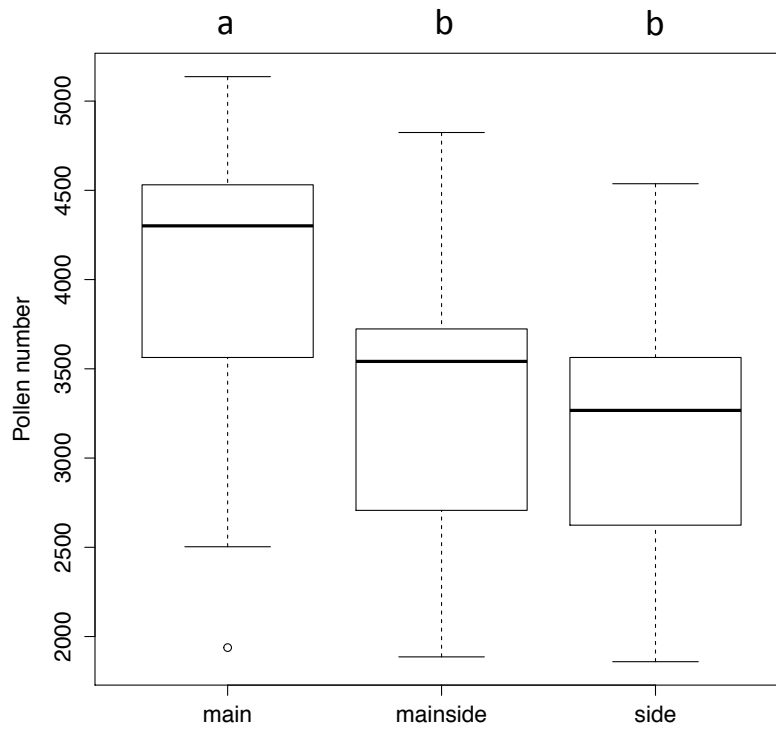

108

109 **Extended Data Figure 12. Pollen number in different floral stems.** Main stems (“main”, N =  
 110 19), side stems branched from main stems (“mainside”, N = 20), and side stems (“side”, N = 19).  
 111 Col-0 plants were used. Letters (a and b) indicate significant differences in pollen number  
 112 between positions determined by analysis of variance and *post hoc* Tukey test ( $P < 0.05$ ).  
 113

Extended Data Table 1. *Arabidopsis thaliana* accessions used in this study.

| ecotype_id# | Accession name | Pollen GWAS | Ovule GWAS | Atwell et al. (2010) | Selection scan |
|-------------|----------------|-------------|------------|----------------------|----------------|
| 5837        | Bor-1          | y           | y          | y                    | y              |
| 6008        | Duk            | NA          | NA         | y                    | y              |
| 6009        | Eden-1         | NA          | NA         | y                    | y              |
| 6016        | Eds-1          | NA          | NA         | y                    | y              |
| 6040        | Kni-1          | NA          | NA         | y                    | y              |
| 6041        | Lis-3          | y           | y          | NA                   | y              |
| 6042        | Lom1-1         | NA          | NA         | y                    | y              |
| 6043        | Löv-1          | NA          | NA         | y                    | y              |
| 6046        | Löv-5          | NA          | NA         | y                    | y              |
| 6064        | Nyl-2          | NA          | NA         | y                    | y              |
| 6074        | Ör-1           | NA          | NA         | y                    | y              |
| 6108        | T480           | y           | y          | NA                   | y              |
| 6189        | TDr-2          | y           | y          | NA                   | y              |
| 6193        | TDr-7          | y           | y          | NA                   | y              |
| 6243        | Tottarp-2      | NA          | NA         | y                    | y              |
| 6709        | Bg-2           | NA          | NA         | y                    | y              |
| 6897        | Ag-0           | NA          | NA         | y                    | y              |
| 6898        | An-1           | NA          | NA         | y                    | y              |
| 6899        | Bay-0          | NA          | NA         | y                    | y              |
| 6900        | Bil-5          | NA          | NA         | y                    | y              |
| 6901        | Bil-7          | NA          | NA         | y                    | y              |
| 6903        | Bor-4          | y           | y          | y                    | y              |
| 6904        | Br-0           | NA          | NA         | y                    | y              |
| 6905        | Bur-0          | NA          | NA         | y                    | y              |
| 6906        | C24            | NA          | NA         | y                    | y              |
| 6907        | CIBC-17        | y           | y          | y                    | y              |
| 6908        | CIBC-5         | NA          | y          | y                    | y              |
| 6909        | Col-0          | y           | y          | y                    | y              |
| 6910        | Ct-1           | NA          | NA         | y                    | y              |
| 6911        | Cvi-0          | y           | y          | y                    | y              |
| 6913        | Eden-2         | NA          | NA         | y                    | y              |
| 6914        | Edi-0          | NA          | NA         | y                    | y              |
| 6915        | Ei-2           | y           | y          | y                    | y              |
| 6916        | Est-1          | NA          | NA         | y                    | y              |
| 6917        | Fäb-2          | NA          | NA         | y                    | y              |
| 6918        | Fäb-4          | NA          | NA         | y                    | y              |
| 6919        | Ga-0           | NA          | NA         | y                    | y              |
| 6920        | Got-22         | NA          | NA         | y                    | y              |
| 6921        | Got-7          | NA          | NA         | y                    | y              |
| 6922        | Gu-0           | NA          | NA         | y                    | y              |
| 6923        | HR-10          | NA          | NA         | y                    | y              |
| 6924        | HR-5           | NA          | NA         | y                    | y              |
| 6926        | Kin-0          | NA          | NA         | y                    | y              |
| 6927        | Kno-10         | NA          | NA         | y                    | y              |
| 6928        | Kno-18         | NA          | y          | y                    | y              |
| 6929        | Kondara        | y           | y          | y                    | y              |
| 6930        | Kz-1           | NA          | NA         | y                    | y              |
| 6931        | Kz-9           | y           | y          | y                    | y              |
| 6932        | Ler-1          | NA          | NA         | y                    | y              |
| 6933        | LL-0           | y           | y          | y                    | y              |
| 6936        | Lz-0           | y           | y          | y                    | y              |
| 6937        | Mrk-0          | y           | y          | y                    | y              |
| 6938        | Ms-0           | y           | y          | NA                   | y              |
| 6939        | Mt-0           | y           | y          | y                    | y              |

|      |               |    |    |    |   |
|------|---------------|----|----|----|---|
| 6940 | Mz-0          | y  | y  | y  | y |
| 6942 | Nd-1          | NA | NA | y  | y |
| 6943 | NFA-10        | y  | y  | y  | y |
| 6944 | NFA-8         | NA | y  | y  | y |
| 6945 | Nok-3         | y  | y  | y  | y |
| 6946 | Oy-0          | NA | NA | y  | y |
| 6951 | Pu2-23        | y  | y  | y  | y |
| 6956 | Pu2-7         | y  | y  | y  | y |
| 6957 | Pu2-8         | y  | y  | y  | y |
| 6958 | Ra-0          | y  | y  | y  | y |
| 6959 | Ren-1         | y  | y  | y  | y |
| 6960 | Ren-11        | y  | y  | y  | y |
| 6961 | Se-0          | y  | y  | y  | y |
| 6962 | Shahdara      | NA | NA | y  | y |
| 6963 | Sorbo         | y  | y  | y  | y |
| 6964 | Spr1-2        | NA | NA | y  | y |
| 6965 | Spr1-6        | NA | NA | y  | y |
| 6966 | Sq-1          | y  | y  | y  | y |
| 6967 | Sq-8          | y  | y  | y  | y |
| 6968 | Tamm-2        | NA | NA | y  | y |
| 6969 | Tamm-27       | NA | NA | y  | y |
| 6970 | Ts-1          | y  | y  | y  | y |
| 6971 | Ts-5          | NA | NA | y  | y |
| 6972 | Tsu-1         | y  | y  | y  | y |
| 6973 | UII2-3        | NA | NA | y  | y |
| 6974 | UII2-5        | NA | NA | y  | y |
| 6975 | Uod-1         | y  | y  | y  | y |
| 6976 | Uod-7         | y  | y  | y  | y |
| 6977 | Van-0         | y  | y  | y  | y |
| 6978 | Wa-1          | NA | y  | y  | y |
| 6979 | Wei-0         | y  | y  | y  | y |
| 6980 | Ws-0          | y  | y  | y  | y |
| 6981 | Ws-2          | NA | NA | y  | y |
| 6982 | Wt-5          | y  | y  | y  | y |
| 6983 | Yo-0          | NA | NA | y  | y |
| 6984 | Zdr-1         | y  | y  | y  | y |
| 6985 | Zdr-6         | y  | y  | y  | y |
| 6988 | Alc-0         | NA | NA | y  | y |
| 7000 | Aa-0          | NA | NA | y  | y |
| 7014 | Ba-1          | NA | NA | y  | y |
| 7033 | Buckhorn Pass | NA | NA | y  | y |
| 7062 | Ca-0          | NA | NA | y  | y |
| 7064 | Cnt-1         | NA | NA | y  | y |
| 7081 | Co            | NA | NA | y  | y |
| 7094 | Da-0          | NA | NA | y  | y |
| 7123 | Ep-0          | NA | NA | y  | y |
| 7147 | Gie-0         | NA | NA | y  | y |
| 7163 | Ha-0          | NA | NA | y  | y |
| 7169 | Hh-0          | y  | y  | NA | y |
| 7172 | HI-3          | y  | y  | NA | y |
| 7176 | Is-1          | y  | y  | NA | y |
| 7178 | Jm-1          | y  | y  | NA | y |
| 7181 | Je-0          | NA | y  | NA | y |
| 7188 | Kelsterbach-2 | y  | y  | NA | y |
| 7192 | Kil-0         | y  | y  | NA | y |
| 7195 | KI-1          | y  | y  | NA | y |

|      |             |    |    |    |   |
|------|-------------|----|----|----|---|
| 7199 | Kl-5        | y  | y  | NA | y |
| 7201 | Kr-0        | y  | y  | NA | y |
| 7205 | Krot-2      | y  | y  | NA | y |
| 7210 | La-1        | y  | y  | NA | y |
| 7223 | Li-2:1      | y  | y  | NA | y |
| 7224 | Li-3        | y  | y  | NA | y |
| 7227 | Li-5:2      | y  | y  | NA | y |
| 7228 | Li-5:3      | y  | y  | NA | y |
| 7229 | Li-6        | y  | y  | NA | y |
| 7231 | Li-7        | y  | y  | y  | y |
| 7238 | LI-1        | y  | y  | NA | y |
| 7239 | LI-2        | y  | y  | NA | y |
| 7242 | Lo-2        | y  | y  | NA | y |
| 7244 | Mnz-0       | y  | y  | NA | y |
| 7246 | Ma-2        | y  | y  | NA | y |
| 7252 | Mc-0        | y  | y  | NA | y |
| 7255 | Mh-0        | y  | y  | y  | y |
| 7256 | Mh-1        | y  | y  | NA | y |
| 7258 | Nw-0        | y  | y  | NA | y |
| 7260 | Nw-2        | y  | y  | NA | y |
| 7262 | Nw-4        | y  | y  | NA | y |
| 7265 | Nd-0        | y  | y  | NA | y |
| 7268 | Np-0        | y  | y  | NA | y |
| 7275 | No-0        | y  | y  | y  | y |
| 7276 | Ob-0        | y  | NA | NA | y |
| 7277 | Ob-1        | y  | y  | NA | y |
| 7280 | Old-1       | y  | y  | NA | y |
| 7282 | Or-0        | y  | y  | y  | y |
| 7283 | Ors-1       | y  | y  | NA | y |
| 7284 | Ors-2       | y  | y  | NA | y |
| 7287 | Ove-0       | y  | y  | NA | y |
| 7291 | Pa-2        | y  | y  | NA | y |
| 7292 | Pa-3        | y  | y  | NA | y |
| 7296 | Petergof    | NA | y  | y  | y |
| 7297 | Pf-0        | y  | y  | NA | y |
| 7299 | Pi-2        | y  | y  | NA | y |
| 7300 | Pla-0       | y  | y  | NA | y |
| 7301 | Pla-1       | y  | y  | NA | y |
| 7303 | Pla-3       | y  | y  | NA | y |
| 7305 | Pt-0        | y  | y  | NA | y |
| 7306 | Pog-0       | NA | NA | y  | y |
| 7307 | Pn-0        | y  | y  | NA | y |
| 7309 | Po-1        | y  | y  | NA | y |
| 7310 | Pr-0        | y  | y  | NA | y |
| 7316 | Rhen-1      | y  | y  | NA | y |
| 7317 | Ri-0        | y  | y  | NA | y |
| 7320 | Rou-0       | y  | y  | NA | y |
| 7323 | Rubezhnoe-1 | NA | NA | y  | y |
| 7328 | Sf-2        | y  | y  | NA | y |
| 7330 | Sapporo-0   | y  | y  | NA | y |
| 7331 | Sh-0        | y  | y  | NA | y |
| 7333 | Sei-0       | y  | y  | NA | y |
| 7337 | Si-0        | y  | y  | NA | y |
| 7340 | Sav-0       | y  | y  | NA | y |
| 7343 | Sp-0        | y  | y  | NA | y |
| 7344 | Sg-1        | y  | y  | NA | y |



|      |           |    |    |    |   |
|------|-----------|----|----|----|---|
| 7346 | Ste-0     | NA | NA | y  | y |
| 7351 | Ty-0      | y  | NA | NA | y |
| 7352 | Te-0      | NA | y  | NA | y |
| 7353 | Tha-1     | y  | y  | NA | y |
| 7354 | Ting-1    | y  | y  | NA | y |
| 7355 | Tiv-1     | y  | y  | NA | y |
| 7372 | Tscha-1   | y  | y  | NA | y |
| 7373 | Tsu-0     | y  | y  | NA | y |
| 7376 | Tu-1      | y  | y  | NA | y |
| 7378 | Uk-1      | y  | y  | NA | y |
| 7379 | Uk-2      | y  | y  | NA | y |
| 7381 | Uk-4      | y  | y  | NA | y |
| 7382 | Utrecht   | y  | y  | NA | y |
| 7384 | Ven-1     | y  | y  | NA | y |
| 7386 | Vi-0      | y  | y  | NA | y |
| 7390 | Wag-3     | y  | y  | NA | y |
| 7391 | Wag-4     | NA | y  | NA | y |
| 7392 | Wag-5     | y  | y  | NA | y |
| 7394 | Wa-1      | y  | y  | NA | y |
| 7403 | Wei-1     | y  | y  | NA | y |
| 7404 | Wc-1      | y  | y  | NA | y |
| 7405 | Wc-2      | y  | y  | NA | y |
| 7406 | Wt-1      | y  | y  | NA | y |
| 7408 | Wt-3      | y  | y  | NA | y |
| 7411 | WI-0      | y  | y  | NA | y |
| 7413 | Wil-2     | y  | y  | NA | y |
| 7418 | Zu-1      | y  | y  | y  | y |
| 7423 | Jl-2      | y  | y  | NA | y |
| 7424 | Jl-3      | y  | y  | y  | y |
| 7425 | Jl-4      | y  | y  | NA | y |
| 7430 | Nc-1      | y  | y  | NA | y |
| 7438 | N13       | y  | y  | y  | y |
| 7446 | N4        | y  | y  | NA | y |
| 7449 | N7        | y  | y  | NA | y |
| 7457 | Rld-2     | y  | y  | NA | y |
| 7460 | Da(1)-12  | NA | NA | y  | y |
| 7461 | H55       | NA | NA | y  | y |
| 7477 | WAR       | NA | NA | y  | y |
| 7514 | RRS-7     | y  | y  | y  | y |
| 7515 | RRS-10    | y  | y  | y  | y |
| 7516 | Vär2-1    | NA | NA | y  | y |
| 7517 | Vär2-6    | NA | NA | y  | y |
| 7518 | ÖMö2-1    | NA | NA | y  | y |
| 7519 | ÖMö2-3    | NA | NA | y  | y |
| 7520 | Lp2-2     | y  | y  | y  | y |
| 7521 | Lp2-6     | y  | y  | y  | y |
| 7522 | Mr-0      | NA | NA | y  | y |
| 7523 | Pna-17    | y  | y  | y  | y |
| 7524 | Rmx-A02   | NA | NA | y  | y |
| 7525 | Rmx-A180  | y  | y  | y  | y |
| 7526 | Pna-10    | NA | NA | y  | y |
| 8213 | Pro-0     | NA | NA | y  | y |
| 8214 | Gy-0      | NA | NA | y  | y |
| 8215 | Fei-0     | NA | NA | y  | y |
| 8222 | Lis-2     | NA | NA | y  | y |
| 8230 | Algutsrum | NA | NA | y  | y |

|      |            |    |    |   |   |
|------|------------|----|----|---|---|
| 8231 | Brö1-6     |    | NA | y | y |
| 8233 | Dem-4      | NA | NA | y | y |
| 8235 | Hod        | NA | NA | y | y |
| 8236 | HSm        | NA | NA | y | y |
| 8237 | Kävlinge-1 | NA | NA | y | y |
| 8239 | PHW-3      | NA | NA | y | y |
| 8240 | Kulturen-1 | NA | NA | y | y |
| 8241 | Liarum     | NA | NA | y | y |
| 8242 | Lillö-1    | NA | NA | y | y |
| 8243 | PHW-2      | NA | NA | y | y |
| 8245 | Seattle-0  | NA | NA | y | y |
| 8247 | San-2      | NA | NA | y | y |
| 8249 | Vimmerby   | NA | NA | y | y |
| 8254 | Ang-0      | NA | NA | y | y |
| 8256 | Bå1-2      | NA | NA | y | y |
| 8258 | Bå4-1      | y  | y  | y | y |
| 8259 | Bå5-1      | NA | NA | y | y |
| 8264 | Bla-1      | NA | NA | y | y |
| 8265 | Blh-1      | NA | NA | y | y |
| 8266 | Boo2-1     | NA | NA | y | y |
| 8270 | Bs-1       | NA | NA | y | y |
| 8271 | Bu-0       | NA | NA | y | y |
| 8274 | Can-0      | NA | NA | y | y |
| 8275 | Cen-0      | NA | NA | y | y |
| 8283 | Dra3-1     | NA | NA | y | y |
| 8284 | Drall-1    | NA | NA | y | y |
| 8285 | Drall-1    | NA | NA | y | y |
| 8290 | En-1       | NA | NA | y | y |
| 8296 | Gd-1       | NA | NA | y | y |
| 8297 | Ge-0       | NA | NA | y | y |
| 8300 | Gr-1       | NA | NA | y | y |
| 8306 | Hov4-1     | NA | NA | y | y |
| 8310 | Hs-0       | NA | NA | y | y |
| 8311 | In-0       | NA | NA | y | y |
| 8312 | Is-0       | NA | NA | y | y |
| 8313 | Jm-0       | NA | NA | y | y |
| 8314 | Ka-0       | NA | NA | y | y |
| 8323 | Lc-0       | NA | NA | y | y |
| 8325 | Lip-0      | NA | NA | y | y |
| 8326 | Lis-1      | NA | NA | y | y |
| 8329 | Lm-2       | NA | NA | y | y |
| 8334 | Lu-1       | NA | NA | y | y |
| 8335 | Lund       | NA | NA | y | y |
| 8337 | Mir-0      | NA | NA | y | y |
| 8343 | Na-1       | NA | NA | y | y |
| 8351 | Ost-0      | NA | NA | y | y |
| 8353 | Pa-1       | NA | NA | y | y |
| 8354 | Per-1      | NA | NA | y | y |
| 8357 | Pla-0      | NA | NA | y | y |
| 8365 | Rak-2      | NA | NA | y | y |
| 8366 | Rd-0       | NA | NA | y | y |
| 8369 | Rev-1      | NA | NA | y | y |
| 8374 | Rsch-4     | NA | NA | y | y |
| 8376 | Sanna-2    | NA | NA | y | y |
| 8378 | Sap-0      | NA | NA | y | y |
| 8387 | St-0       | NA | NA | y | y |

|        |                |    |    |    |   |
|--------|----------------|----|----|----|---|
| 8388   | Stw-0          | NA | NA | y  | y |
| 8389   | Ta-0           | NA | NA | y  | y |
| 8395   | Tu-0           | NA | NA | y  | y |
| 8411   | Rd-0           | NA | NA | y  | y |
| 8412   | Sav-0          | NA | NA | y  | y |
| 8420   | Kelsterbach-4  | NA | NA | y  | y |
| 8422   | Fjä1-1         | NA | NA | y  | y |
| 8423   | Hov2-1         | NA | NA | y  | y |
| 8424   | Kas-2          | NA | NA | y  | y |
| 8426   | UII1-1         | NA | NA | y  | y |
| 8430   | Lisse          | NA | NA | y  | y |
| 8534   | 328ME007       | NA | y  | NA | y |
| 8608   | 11ME1.23       | y  | y  | NA | y |
| 8730   | 11PNA1.9       | y  | y  | NA | y |
| 8770   | 11PNA3.65      | y  | y  | NA | y |
| 8787   | 11PNA3.86      | y  | y  | NA | y |
| 8791   | 11PNA3.90      | y  | y  | NA | y |
| 9057   | Vinslöv        | NA | NA | y  | y |
| 9058   | Västervik      | NA | NA | y  | y |
| 100000 | Wil-1-Dean-Lab | NA | NA | y  | y |

\* "y" indicates the accession was used for each analysis.

# "ecotype\_id" was according to Horton et al. (2012).

Extended Data Table 2. Pollen number phenotype of 144 accessions used for GWAS.

| ecotype_id | Pollen number | ecotype_id | Pollen number | ecotype_id | Pollen number |
|------------|---------------|------------|---------------|------------|---------------|
| 5837       | 7355.416      | 7201       | 3420.000      | 7337       | 3276.000      |
| 6041       | 4459.114      | 7205       | 5904.000      | 7340       | 4068.000      |
| 6108       | 4219.922      | 7210       | 2808.000      | 7343       | 4032.000      |
| 6189       | 5265.087      | 7223       | 3168.000      | 7344       | 3384.000      |
| 6193       | 4626.375      | 7224       | 7632.000      | 7351       | 3888.000      |
| 6903       | 8549.642      | 7227       | 2952.000      | 7353       | 6696.000      |
| 6907       | 3871.534      | 7228       | 4608.000      | 7354       | 2880.000      |
| 6909       | 5508.000      | 7229       | 3924.000      | 7355       | 4680.000      |
| 6911       | 3024.000      | 7231       | 5544.000      | 7372       | 2844.000      |
| 6915       | 3904.466      | 7238       | 3708.000      | 7373       | 5256.000      |
| 6929       | 3280.487      | 7239       | 3816.000      | 7376       | 5760.000      |
| 6931       | 5265.087      | 7242       | 4536.000      | 7378       | 4104.000      |
| 6933       | 3488.480      | 7244       | 3600.000      | 7379       | 4464.000      |
| 6936       | 4043.128      | 7246       | 3528.000      | 7381       | 2592.000      |
| 6937       | 4336.052      | 7252       | 3564.000      | 7382       | 4788.000      |
| 6938       | 3784.004      | 7255       | 4104.000      | 7384       | 5472.000      |
| 6939       | 5090.893      | 7256       | 3132.000      | 7386       | 5616.000      |
| 6940       | 2710.240      | 7258       | 2952.000      | 7390       | 5976.000      |
| 6943       | 4336.052      | 7260       | 2088.000      | 7392       | 3996.000      |
| 6945       | 3771.871      | 7262       | 2808.000      | 7394       | 3672.000      |
| 6951       | 3465.081      | 7265       | 4608.000      | 7403       | 5004.000      |
| 6956       | 3627.142      | 7268       | 4536.000      | 7404       | 3024.000      |
| 6957       | 4112.459      | 7275       | 3060.000      | 7405       | 4212.000      |
| 6958       | 4103.793      | 7276       | 3780.000      | 7406       | 3384.000      |
| 6959       | 3003.163      | 7277       | 2880.000      | 7408       | 4500.000      |
| 6960       | 4568.310      | 7280       | 3528.000      | 7411       | 2880.000      |
| 6961       | 3349.818      | 7282       | 2880.000      | 7413       | 3132.000      |
| 6963       | 3284.820      | 7283       | 5652.000      | 7418       | 3240.000      |
| 6966       | 4219.922      | 7284       | 4176.000      | 7423       | 4032.000      |
| 6967       | 3929.599      | 7287       | 2772.000      | 7424       | 5472.000      |
| 6970       | 3384.484      | 7291       | 2304.000      | 7425       | 4356.000      |
| 6972       | 4667.107      | 7292       | 4176.000      | 7430       | 3456.000      |
| 6975       | 2594.110      | 7297       | 3816.000      | 7438       | 3067.294      |
| 6976       | 3523.146      | 7299       | 4644.000      | 7446       | 3600.000      |
| 6977       | 4452.181      | 7300       | 3240.000      | 7449       | 3888.000      |
| 6979       | 3407.016      | 7301       | 5040.000      | 7457       | 4392.000      |
| 6980       | 4452.181      | 7303       | 5112.000      | 7514       | 4944.431      |
| 6982       | 4112.459      | 7305       | 3996.000      | 7515       | 3000.563      |
| 6984       | 5126.425      | 7307       | 2880.000      | 7520       | 3465.081      |
| 6985       | 4452.181      | 7309       | 5544.000      | 7521       | 2942.499      |
| 7169       | 5256.000      | 7310       | 4356.000      | 7523       | 3290.887      |
| 7172       | 4068.000      | 7316       | 4644.000      | 7525       | 3037.829      |
| 7176       | 3636.000      | 7317       | 2844.000      | 8258       | 3290.887      |
| 7178       | 2808.000      | 7320       | 5832.000      | 8608       | 3581.210      |
| 7188       | 2124.000      | 7328       | 3096.000      | 8730       | 2926.033      |
| 7192       | 3744.000      | 7330       | 2304.000      | 8770       | 2587.177      |
| 7195       | 4140.000      | 7331       | 3888.000      | 8787       | 4045.728      |
| 7199       | 3204.000      | 7333       | 4104.000      | 8791       | 4219.922      |

Extended Data Table 3 Ovule number phenotype of 151 accessions used for GWAS

| ecotype_id | Ovule number | ecotype_id | Ovule number | ecotype_id | Ovule number |
|------------|--------------|------------|--------------|------------|--------------|
| 5837       | 64.000       | 7192       | 78.667       | 7333       | 86.667       |
| 6041       | 87.556       | 7195       | 77.200       | 7337       | 79.600       |
| 6108       | 78.667       | 7199       | 66.250       | 7340       | 84.667       |
| 6189       | 74.000       | 7201       | 69.500       | 7343       | 71.500       |
| 6193       | 76.500       | 7205       | 66.000       | 7344       | 74.667       |
| 6903       | 85.333       | 7210       | 80.000       | 7352       | 50.000       |
| 6907       | 65.500       | 7223       | 74.000       | 7353       | 58.500       |
| 6908       | 64.800       | 7224       | 75.250       | 7354       | 56.500       |
| 6909       | 66.500       | 7227       | 60.750       | 7355       | 57.500       |
| 6911       | 71.000       | 7228       | 70.667       | 7372       | 69.500       |
| 6915       | 76.000       | 7229       | 61.000       | 7373       | 75.500       |
| 6928       | 54.000       | 7231       | 74.800       | 7376       | 60.000       |
| 6929       | 72.500       | 7238       | 56.500       | 7378       | 69.000       |
| 6931       | 79.000       | 7239       | 69.500       | 7379       | 63.500       |
| 6933       | 64.800       | 7242       | 62.000       | 7381       | 65.750       |
| 6936       | 81.067       | 7244       | 76.000       | 7382       | 70.750       |
| 6937       | 73.250       | 7246       | 66.000       | 7384       | 51.500       |
| 6938       | 65.000       | 7252       | 47.333       | 7386       | 65.800       |
| 6939       | 76.000       | 7255       | 73.750       | 7390       | 50.250       |
| 6940       | 59.429       | 7256       | 62.500       | 7391       | 47.000       |
| 6943       | 79.000       | 7258       | 66.000       | 7392       | 72.000       |
| 6944       | 84.000       | 7260       | 69.250       | 7394       | 70.000       |
| 6945       | 58.933       | 7262       | 72.000       | 7403       | 75.500       |
| 6951       | 68.286       | 7265       | 61.200       | 7404       | 64.000       |
| 6956       | 61.429       | 7268       | 78.667       | 7405       | 71.500       |
| 6957       | 64.000       | 7275       | 85.000       | 7406       | 68.000       |
| 6958       | 77.333       | 7277       | 55.500       | 7408       | 72.000       |
| 6959       | 73.750       | 7280       | 63.500       | 7411       | 65.500       |
| 6960       | 75.500       | 7282       | 71.000       | 7413       | 68.000       |
| 6961       | 70.286       | 7283       | 56.500       | 7418       | 61.600       |
| 6963       | 76.000       | 7284       | 55.000       | 7423       | 72.000       |
| 6966       | 81.538       | 7287       | 60.000       | 7424       | 66.500       |
| 6967       | 69.000       | 7291       | 52.500       | 7425       | 71.500       |
| 6970       | 65.500       | 7292       | 70.000       | 7430       | 76.750       |
| 6972       | 73.667       | 7296       | 74.000       | 7438       | 67.000       |
| 6975       | 71.000       | 7297       | 70.667       | 7446       | 50.000       |
| 6976       | 61.667       | 7299       | 75.000       | 7449       | 66.000       |
| 6977       | 68.667       | 7300       | 57.000       | 7457       | 71.333       |
| 6978       | 66.667       | 7301       | 41.000       | 7514       | 70.000       |
| 6979       | 73.500       | 7303       | 60.667       | 7515       | 47.000       |
| 6980       | 73.500       | 7305       | 84.000       | 7520       | 84.727       |
| 6982       | 64.000       | 7307       | 68.000       | 7521       | 71.429       |
| 6984       | 86.000       | 7309       | 55.500       | 7523       | 56.500       |
| 6985       | 65.000       | 7310       | 83.600       | 7525       | 67.200       |
| 7169       | 44.333       | 7316       | 58.667       | 8258       | 75.500       |
| 7172       | 77.000       | 7317       | 65.800       | 8534       | 59.333       |
| 7176       | 69.500       | 7320       | 60.000       | 8608       | 60.000       |
| 7178       | 75.500       | 7328       | 49.000       | 8730       | 62.667       |
| 7181       | 52.000       | 7330       | 66.000       | 8770       | 65.333       |
| 7188       | 65.500       | 7331       | 62.750       | 8787       | 71.500       |
|            |              |            |              | 8791       | 68.000       |

Extended Data Table 4 Association between pollen and ovule numbers and the diverse set of 107 phenotypes

| Category | Phenotype name  | r (pollen) | P (pollen) | r (ovule) | P (ovule) | Category | Phenotype name       | r (pollen) | P (pollen) | r (ovule) | P (ovule) |
|----------|-----------------|------------|------------|-----------|-----------|----------|----------------------|------------|------------|-----------|-----------|
| FL       | 1_LD            | -0.8552    | 0.3974     | -1.5384   | 0.1308    | FL       | 40_2W                | -1.2746    | 0.2106     | -5.3055   | <0.0001   |
| FL       | 2_LDv           | -1.0132    | 0.3169     | -1.8827   | 0.0661    | FL       | 41_4W                | -1.3665    | 0.1805     | -5.2682   | <0.0001   |
| FL       | 3_SD            | -0.8687    | 0.3903     | -2.0476   | 0.0466    | FL       | 42_8W                | -1.5652    | 0.1260     | -4.4811   | 0.0001    |
| FL       | 4_SDV           | -0.0641    | 0.9492     | -1.5905   | 0.1189    | FL       | 43_FLc               | -1.3672    | 0.1790     | -0.7493   | 0.4575    |
| FL       | 5_FT10          | -0.6123    | 0.5433     | -0.4831   | 0.6310    | FL       | 44_FRI               | -0.5210    | 0.6052     | -1.8254   | 0.0744    |
| FL       | 6_FT16          | -1.0725    | 0.2891     | -1.7206   | 0.0914    | FL       | 45_8W.GH.FT          | -0.9187    | 0.3636     | -4.7241   | <0.0001   |
| FL       | 7_FT22          | -1.7315    | 0.0899     | -3.3504   | 0.0015    | FL       | 46_8W.GH.LN          | -0.3272    | 0.8161     | -0.0032   | 0.9999    |
| DEV      | 8_Seed.Dormancy | -0.9639    | 0.3415     | -0.2198   | 0.8271    | FL       | 47_0W.GH.FT          | -1.5063    | 0.1405     | -3.8167   | 0.0004    |
| DEF      | 9_Ernco5        | -1.0075    | 0.3204     | -1.2389   | 0.2226    | FL       | 48_0W.GH.LN          | -1.1528    | 0.2564     | -3.4669   | 0.0012    |
| DEF      | 10_Ernwa1       | 1.5968     | 0.1193     | -0.0721   | 0.9429    | FL       | 57_FT.Field          | 0.4327     | 0.6675     | 0.0373    | 0.9704    |
| DEF      | 11_Ernw1        | 1.8927     | 0.0667     | -0.0061   | 0.9951    | FL       | 58_FT.Diameter.Field | -1.4339    | 0.1592     | -0.4120   | 0.6823    |
| DEF      | 12_Hiks1        | 1.3100     | 0.1995     | -0.5055   | 0.6163    | FL       | 59_FT.GH             | -1.6428    | 0.1081     | -3.1723   | 0.0027    |
| DEF      | 13_Noco2        | 1.2426     | 0.2220     | 1.5227    | 0.1357    | DEV      | 60_FT.Duration.GH    | -1.5166    | 0.1370     | -1.6283   | 0.1103    |
| ION      | 14_L17          | 2.1396     | 0.0389     | 3.0258    | 0.0042    | DEV      | 61_LC.Duration.GH    | -1.9732    | 0.0552     | -3.0069   | 0.0043    |
| ION      | 15_B11          | -1.0237    | 0.3125     | 0.0339    | 0.9731    | DEV      | 62_LFS.GH            | -1.8465    | 0.0720     | -3.1233   | 0.0031    |
| ION      | 16_Na23         | 0.3026     | 0.7638     | -0.8206   | 0.4165    | DEV      | 63_MT.GH             | 0.7352     | 0.4664     | 2.0756    | 0.0435    |
| ION      | 17_Mg25         | 1.6761     | 0.1019     | -0.3061   | 0.7610    | DEV      | 64_RP.GH             | -1.1985    | 0.2376     | -0.3450   | 0.7317    |
| ION      | 18_P31          | -1.6564    | 0.1059     | -0.1148   | 0.9091    | DEF      | 65_A11               | -0.2961    | 0.7667     | -1.2011   | 0.2360    |
| ION      | 19_S34          | 0.5911     | 0.5560     | 0.4184    | 0.6778    | DEF      | 66_A11.CFU2          | -0.4207    | 0.6762     | 0.9256    | 0.3996    |
| ION      | 20_K39          | 0.0590     | 0.9532     | -2.1852   | 0.0345    | DEF      | 67_As                | -2.9794    | 0.0049     | -0.9480   | 0.3482    |
| ION      | 21_Ca43         | 0.7194     | 0.4763     | -0.6555   | 0.5157    | DEF      | 68_As.CFU2           | -0.1424    | 0.8875     | -0.3565   | 0.7231    |
| ION      | 22_Mn55         | -0.8659    | 0.3920     | 1.1553    | 0.2545    | DEF      | 69_Bs                | 1.5872     | 0.1203     | -0.8652   | 0.3915    |
| ION      | 23_Fe56         | 0.2868     | 0.7758     | -1.8483   | 0.0716    | DEF      | 70_Bs.CFU2           | 0.2052     | 0.8385     | -0.0102   | 0.9919    |
| ION      | 24_Co59         | -0.7493    | 0.4583     | -0.5890   | 0.5590    | DEF      | 71_A12               | -1.2512    | 0.2181     | -1.6334   | 0.1094    |
| ION      | 25_Ni60         | 0.4532     | 0.6530     | -0.0888   | 0.9296    | DEF      | 72_A12.CFU2          | -0.6648    | 0.5100     | -0.6018   | 0.5503    |
| ION      | 26_Cu65         | 0.0718     | 0.9431     | 0.6302    | 0.5320    | DEF      | 73_As2               | -0.2429    | 0.8094     | -0.7852   | 0.4365    |
| ION      | 27_Zn66         | 0.6017     | 0.5009     | -1.0796   | 0.2865    | DEF      | 74_As2.CFU2          | 0.9693     | 0.3382     | 1.3879    | 0.1720    |
| ION      | 28_As75         | 0.2697     | 0.7899     | 1.8220    | 0.0756    | DEV      | 75_FW                | 2.6348     | 0.0120     | 0.8764    | 0.3857    |
| ION      | 29_Se82         | 0.9042     | 0.3716     | 0.6291    | 0.5327    | DEV      | 76_DW                | 2.1601     | 0.0370     | 1.0485    | 0.3003    |
| ION      | 30_Mo88         | -0.1156    | 0.9086     | 0.1483    | 0.8828    | DEV      | 77_LES               | -1.0778    | 0.2877     | 0.3975    | 0.6929    |
| ION      | 31_Cd114        | 0.9132     | 0.3669     | 0.0092    | 0.9927    | DEV      | 78_YEL               | -0.2012    | 0.8416     | 0.3321    | 0.7414    |
| DEF      | 32_i.avrPpB.i.  | 0.7417     | 0.4631     | 1.1303    | 0.2651    | DEV      | 79_LY                | -0.9568    | 0.3445     | 0.5497    | 0.5554    |
| DEF      | 33_i.avrRpm1.i. | 0.9748     | 0.3365     | 1.2484    | 0.2195    | FL       | 80_LN10              | -0.3843    | 0.7028     | 0.5851    | 0.5614    |
| DEF      | 34_i.avrRpt2.i. | 0.0851     | 0.9327     | -0.4572   | 0.6500    | FL       | 81_LN16              | -1.2748    | 0.2097     | -2.1525   | 0.0368    |
| DEF      | 35_i.avrB.i.    | 1.0172     | 0.3157     | 1.3865    | 0.1731    | FL       | 82_LN22              | -1.7027    | 0.0962     | -3.1208   | 0.0031    |
| FL       | 39_OW           | -1.7238    | 0.0936     | -4.5784   | <0.0001   | DEV      | 158_Silique.16       | -0.3224    | 0.7489     | 1.4653    | 0.1501    |

FL: flowering phenotypes. DEV: developmental phenotypes. DEF: defense-related phenotypes. ION: ionomics phenotypes. For the details of phenotypes, see Atwell et al. (2010).  
r: Pearson's correlation coefficient. P: P-values. For pollen number, log-transformed phenotype values were used.

| Category | Phenotype name         | r (pollen) | P (pollen) | r (ovule) | P (ovule) |
|----------|------------------------|------------|------------|-----------|-----------|
| DEV      | 159_Silique.22         | -1.8674    | 0.0694     | -0.6675   | 0.5143    |
| DEV      | 161_Germ.10            | 1.2372     | 0.2231     | -1.2910   | 0.2032    |
| DEV      | 162_Germ.16            | 1.3593     | 0.1817     | -0.0174   | 0.9882    |
| DEV      | 163_Germ.22            | -1.0055    | 0.3205     | -0.6597   | 0.5127    |
| DEV      | 164_Width.10           | -0.9511    | 0.3471     | 1.1540    | 0.2544    |
| DEV      | 165_Width.16           | 0.5501     | 0.5853     | 1.8152    | 0.0762    |
| DEV      | 166_Width.22           | 1.0230     | 0.3123     | 1.0241    | 0.3112    |
| DEV      | 167_Chlorosis.10       | -0.7454    | 0.4603     | -1.0094   | 0.3181    |
| DEV      | 168_Chlorosis.16       | -0.6342    | 0.5296     | -1.2568   | 0.2163    |
| DEV      | 169_Chlorosis.22       | 1.5453     | 0.1300     | 1.8458    | 0.0714    |
| DEV      | 170_Anihocyanin.10     | -0.9742    | 0.3357     | 0.9999    | 0.3226    |
| DEV      | 171_Anihocyanin.16     | 1.4269     | 0.1614     | 0.9579    | 0.3432    |
| DEV      | 172_Anihocyanin.22     | -0.9137    | 0.3662     | 1.7044    | 0.0951    |
| DEV      | 173_Leaf.serr.10       | 0.4007     | 0.6908     | 1.1439    | 0.2589    |
| DEV      | 174_Leaf.serr.16       | 1.2759     | 0.2093     | 0.6462    | 0.5214    |
| DEV      | 175_Leaf.serr.22       | -0.1472    | 0.8837     | -0.6053   | 0.5480    |
| DEV      | 176_Leaf.roll.10       | 0.1889     | 0.8511     | 0.0975    | 0.9228    |
| DEV      | 177_Leaf.roll.16       | 0.5837     | 0.5627     | -1.1581   | 0.2529    |
| DEV      | 178_Leaf.roll.22       | -0.1862    | 0.8532     | 0.8616    | 0.3934    |
| DEV      | 179_Rosette.Erect.22   | -0.2484    | 0.8051     | -0.1686   | 0.8668    |
| DEV      | 182_Hypocotyl.length   | -0.7765    | 0.4424     | -0.2015   | 0.8413    |
| DEF      | 183_Trichome.avg.C     | -2.1268    | 0.0398     | -0.8471   | 0.4016    |
| DEF      | 184_Trichome.avg.A     | -1.5666    | 0.1253     | -0.4948   | 0.6232    |
| DEF      | 185_Aphid.number       | -0.1845    | 0.8546     | -0.5621   | 0.5770    |
| DEF      | 186_Bacterial.titer    | 0.5172     | 0.6079     | 0.4432    | 0.6599    |
| DEV      | 272_Seeding.Growth     | 0.1026     | 0.9188     | 0.8743    | 0.3867    |
| DEV      | 273_Vern.Growth        | -0.1666    | 0.8686     | -0.0107   | 0.9915    |
| DEV      | 274_Alter.Vern.Growth  | 0.6230     | 0.5368     | 0.8083    | 0.4232    |
| DEV      | 277_Secondary.Dormancy | 2.2562     | 0.0304     | 1.6605    | 0.1048    |
| DEV      | 278_Germ.in.dark       | -2.1808    | 0.0360     | -2.2820   | 0.0280    |
| DEV      | 279_DSD50              | 0.2367     | 0.8141     | 1.1101    | 0.2730    |
| DEV      | 280_Seed.bank.133.91   | 0.1515     | 0.8904     | 0.8540    | 0.3978    |
| DEV      | 281_Storage.7.days     | -0.6102    | 0.5452     | 1.5378    | 0.1312    |
| DEV      | 282_Storage.28.days    | 0.3415     | 0.7345     | 0.6413    | 0.5247    |
| DEV      | 283_Storage.56.days    | 0.4940     | 0.6240     | -0.8072   | 0.4239    |

Extended Data Table 5 Association between pollen and ovule numbers and climate variables

|                                               | <i>r</i> (pollen) | <i>P</i> value (pollen) | <i>r</i> (ovule) | <i>P</i> value (ovule) |
|-----------------------------------------------|-------------------|-------------------------|------------------|------------------------|
| LATITUDE                                      | 0.0252            | 0.9799                  | 0.4996           | 0.6182                 |
| LONGITUDE                                     | 0.4021            | 0.6883                  | 1.3283           | 0.1865                 |
| bio4.temperature.seasonality                  | -0.0660           | 0.9475                  | 1.3853           | 0.1684                 |
| bio5.maximum.temperature.in.the.warmest.month | -0.2095           | 0.8344                  | -0.9161          | 0.3613                 |
| bio6.minimum.temperature.in.the.coldest.month | -0.0695           | 0.9447                  | -2.2712          | 0.0248                 |
| bio13.precipitation.in.the.wettest.month      | -1.2478           | 0.2145                  | -1.0581          | 0.2920                 |
| bio14.precipitation.in.the.driest.month       | -0.3502           | 0.7268                  | -0.5938          | 0.5537                 |
| bio15.precipitation.cv                        | 0.0513            | 0.9592                  | 1.0617           | 0.2904                 |
| PAR_SPRING                                    | 0.3633            | 0.7170                  | -1.5635          | 0.1204                 |
| length.of.the.growing.season                  | 0.1641            | 0.8699                  | -1.2036          | 0.2310                 |
| number.of.consecutive.cold.days               | -0.2329           | 0.8162                  | 0.8765           | 0.3824                 |
| number.of.consecutive.frost.free.days         | -0.0637           | 0.9493                  | -2.9642          | 0.0036                 |
| relative.humidity_spring                      | -0.5172           | 0.6060                  | 0.3048           | 0.7610                 |
| daylength.spring                              | -0.2057           | 0.8374                  | -0.0372          | 0.9704                 |
| aridity.index                                 | -0.5043           | 0.6150                  | -1.7755          | 0.0782                 |

For the details of climate variables, see Hancock et al. (2011).

*r*: Pearson's correlation coefficient. For pollen number, log-transformed phenotype values were used.

Extended Data Table 6 Top rank traits showing fold enrichments of more than 3 in the selection scan.

| Phenotype name    | Phenotype category | Short description                                                                                                  | Fold enrichment | P-value |
|-------------------|--------------------|--------------------------------------------------------------------------------------------------------------------|-----------------|---------|
| Pollen number     | This study         | Pollen number per flower                                                                                           | 6.35            | 0.002   |
| Manganese (Mn55)  | Ionomics           | <i>In planta</i> ion concentration of Manganese                                                                    | 5.88            | 0.006   |
| Bs CFU2           | Defense-related    | <i>In planta</i> bacterial growth (number of CFU / leaf area) of the <i>Pseudomonas viridiflava</i> strain RMX3.1b | 5.77            | 0.003   |
| Leaf roll 22      | Developmental      | Presence or absence of rolled leaves at 8 weeks post germination for plants grown at 10° C                         | 5.13            | 0.001   |
| LN10              | Flowering          | Leaf number at flowering time, 10° C                                                                               | 4.71            | 0.004   |
| LN16              | Flowering          | Leaf number at flowering time, 16° C                                                                               | 4.44            | 0.006   |
| Aphid number      | Defense-related    | Aphid offspring                                                                                                    | 4.44            | 0.008   |
| RP GH             | Developmental      | Number of days between the appearance of the first flower and the plant complete senescence                        | 4.26            | 0.009   |
| LN22              | Flowering          | Leaf number at flowering time, 22° C                                                                               | 4.17            | 0.007   |
| Storage 28 days   | Developmental      | Primary dormancy                                                                                                   | 4.00            | 0.015   |
| As                | Defense-related    | Disease presence or absence following inoculation with <i>Pseudomonas viridiflava</i> strain RMX23.1b              | 3.92            | 0.022   |
| Nickel (Ni60)     | Ionomics           | <i>In planta</i> ion concentration of Nickel                                                                       | 3.85            | 0.019   |
| Noco2             | Defense-related    | Disease presence or absence following inoculation with <i>Perenospora parasitica</i> isolate Noco2                 | 3.77            | 0.017   |
| Ovule number      | This study         | Ovule number per flower                                                                                            | 3.64            | 0.03    |
| Molybdenum (Mo98) | Ionomics           | <i>In planta</i> ion concentration of Molybdenum                                                                   | 3.57            | 0.03    |
| Germ 10           | Developmental      | Days from removal from stratification until emergence of first cotyledon at 10° C                                  | 3.27            | 0.018   |

Pollen and ovule numbers, and phenotypes of Atwell et al. (2010) are shown.

Phenotype categories are based on Atwell et al. (2010).



Extended Data Table 7. Primer list

| Target                                     | Purpose                                       | Forward primer      |                            | Reverse primer      |                             |
|--------------------------------------------|-----------------------------------------------|---------------------|----------------------------|---------------------|-----------------------------|
|                                            |                                               | Primer name         | sequence (5'-3')           | Primer name         | sequence (5'-3')            |
| <i>AT1G25250</i>                           | qPCR                                          | 3931_At1g25250RTf1  | ACACCAGCTAACAGATCCAGATG    | 3932_At1g25250RTr1  | AGATCTCACACACACGTAACCGATCTG |
| <i>AT1G25260 (RDP1)</i>                    | qPCR                                          | 3933_At1g25260RTf1  | AGCGAGATPAGACCAGTGACTTTGTC | 3934_At1g25260RTr1  | CAACAGCCTCCCTAATTCACATTCAC  |
| <i>AT1G25270</i>                           | qPCR                                          | 4075_At1g25270RTf1  | TTCCGATCATGACTGGGAGCAATG   | 4076_At1g25270RTr1  | CGAAAACCACGATTCCCGAAATAAAGC |
| <i>AT5G60390 (EF1-<math>\alpha</math>)</i> | qPCR                                          | 3529_AhEF1aF        | TGAGCACGCTCTTCTTGCTTTCA    | 3530_AhEF1aR        | GGTGGTGGCATCCCATCTTGTITACA  |
| <i>AT1G25250</i>                           | genotyping for <i>GT_5_108298</i> (wild-type) | 3100_GT_5_107916_LP | AGACATGTTGGCTCAGGACAC      | 3101_GT_5_107916_RP | ATGTAAAGGTGGGAGGTCAATG      |
|                                            | genotyping for <i>GT_5_108298</i> (mutant)    | 3100_GT_5_107916_LP | AGACATGTTGGCTCAGGACAC      | 3264_Ds3-1          | ACCCGACCCGGATCGTATCCGGT     |
| <i>AT1G25260 (RDP1)</i>                    | genotyping for <i>rdp1-1</i> (wild-type)      | 3619_At1g25260F04   | TATGATACCCCAATTGAATG       | 3195_SA_064854_RP   | TTTCCATTGTGGCCTAAACTGC      |
|                                            | genotyping for <i>rdp1-1</i> (mutant)         | 2939_SALK_T_DNA_LB  | ATTTTGCCGATTTCCGGAAC       | 3195_SA_064854_RP   | TTTCCATTGTGGCCTAAACTGC      |
|                                            | genotyping for <i>rdp1-2</i> (wild-type)      | 3622_At1g25260F07   | TTGTAGTTTGTGAAGAAGG        | 3551_At1g25260R01   | GTTTAAAATGAGAGAAACCCCG      |
|                                            | genotyping for <i>rdp1-2</i> (mutant)         | 3622_At1g25260F07   | TTGTAGTTTGTGAAGAAGG        | 2946_GABI_T_DNA_LB  | ATATTGACCATCATACTCATTTGC    |

Extended Data Table 8 S-haplogroups of the accessions used for pollen number GWAS.

| ecotype_id | Accession name | S-haplogroup | ecotype_id | Accession name | S-haplogroup | ecotype_id | Accession name | S-haplogroup |
|------------|----------------|--------------|------------|----------------|--------------|------------|----------------|--------------|
| 5837       | Bor-1          | A            | 7201       | Kr-0           | C            | 7337       | Si-0           | A            |
| 6041       | Lis-3          | NA           | 7205       | Krot-2         | NA           | 7340       | Sav-0          | A            |
| 6108       | T480           | NA           | 7210       | La-1           | A            | 7343       | Sp-0           | A            |
| 6189       | TDr-2          | NA           | 7223       | Li-2:1         | A            | 7344       | Sg-1           | A            |
| 6193       | TDr-7          | NA           | 7224       | Li-3           | A            | 7351       | Ty-0           | NA           |
| 6903       | Bor-4          | A            | 7227       | Li-5:2         | NA           | 7353       | Tha-1          | NA           |
| 6907       | CIBC-17        | A            | 7228       | Li-5:3         | NA           | 7354       | Ting-1         | NA           |
| 6909       | Col-0          | A            | 7229       | Li-6           | A            | 7355       | Tiv-1          | NA           |
| 6911       | Cvi-0          | B            | 7231       | Li-7           | A            | 7372       | Tscha-1        | NA           |
| 6915       | Ei-2           | A            | 7238       | LI-1           | A            | 7373       | Tsu-0          | NA           |
| 6929       | Kondara        | A            | 7239       | LI-2           | C            | 7376       | Tu-1           | A            |
| 6931       | Kz-9           | A            | 7242       | Lo-2           | A            | 7378       | Uk-1           | A            |
| 6933       | LL-0           | A            | 7244       | Mnz-0          | NA           | 7379       | Uk-2           | A            |
| 6936       | Lz-0           | C            | 7246       | Ma-2           | A            | 7381       | Uk-4           | A            |
| 6937       | Mrk-0          | A            | 7252       | Mc-0           | NA           | 7382       | Utrecht        | NA           |
| 6938       | Ms-0           | A            | 7255       | Mh-0           | NA           | 7384       | Ven-1          | NA           |
| 6939       | Mt-0           | A            | 7256       | Mh-1           | A            | 7386       | Vi-0           | A            |
| 6940       | Mz-0           | A            | 7258       | Nw-0           | A            | 7390       | Wag-3          | NA           |
| 6943       | NFA-10         | A            | 7260       | Nw-2           | A            | 7392       | Wag-5          | NA           |
| 6945       | Nok-3          | A            | 7262       | Nw-4           | A            | 7394       | Wa-1           | A            |
| 6951       | Pu2-23         | A            | 7265       | Nd-0           | A            | 7403       | Wei-1          | A            |
| 6956       | Pu2-7          | A            | 7268       | Np-0           | NA           | 7404       | Wc-1           | A            |
| 6957       | Pu2-8          | NA           | 7275       | No-0           | A            | 7405       | Wc-2           | A            |
| 6958       | Ra-0           | C            | 7276       | Ob-0           | A            | 7406       | Wt-1           | A            |
| 6959       | Ren-1          | A            | 7277       | Ob-1           | NA           | 7408       | Wt-3           | NA           |
| 6960       | Ren-11         | A            | 7280       | Old-1          | A            | 7411       | WI-0           | NA           |
| 6961       | Se-0           | A            | 7282       | Or-0           | A            | 7413       | Wil-2          | A            |
| 6963       | Sorbo          | A            | 7283       | Ors-1          | NA           | 7418       | Zu-1           | A            |
| 6966       | Sq-1           | A            | 7284       | Ors-2          | NA           | 7423       | Jl-2           | A            |
| 6967       | Sq-8           | A            | 7287       | Ove-0          | A            | 7424       | Jl-3           | A            |
| 6970       | Ts-1           | A            | 7291       | Pa-2           | A            | 7425       | Jl-4           | NA           |
| 6972       | Tsu-1          | A            | 7292       | Pa-3           | A            | 7430       | Nc-1           | A            |
| 6975       | Uod-1          | A            | 7297       | Pf-0           | A            | 7438       | N13            | NA           |
| 6976       | Uod-7          | A            | 7299       | Pi-2           | A            | 7446       | N4             | NA           |
| 6977       | Van-0          | A            | 7300       | Pla-0          | A            | 7449       | N7             | NA           |
| 6979       | Wei-0          | A            | 7301       | Pla-1          | A            | 7457       | Rld-2          | A            |
| 6980       | Ws-0           | A            | 7303       | Pla-3          | A            | 7514       | RRS-7          | NA           |
| 6982       | Wt-5           | C            | 7305       | Pt-0           | A            | 7515       | RRS-10         | NA           |
| 6984       | Zdr-1          | A            | 7307       | Pn-0           | A            | 7520       | Lp2-2          | A            |
| 6985       | Zdr-6          | A            | 7309       | Po-1           | A            | 7521       | Lp2-6          | A            |
| 7169       | Hh-0           | NA           | 7310       | Pr-0           | A            | 7523       | Pna-17         | NA           |
| 7172       | HI-3           | A            | 7316       | Rhen-1         | NA           | 7525       | Rmx-A180       | NA           |
| 7176       | Is-1           | A            | 7317       | Ri-0           | NA           | 8258       | Bâ4-1          | NA           |
| 7178       | Jm-1           | A            | 7320       | Rou-0          | A            | 8608       | 11ME1.23       | NA           |
| 7188       | Kelsterbach-2  | A            | 7328       | Sf-2           | A            | 8730       | 11PNA1.9       | NA           |
| 7192       | Kil-0          | A            | 7330       | Sapporo-0      | NA           | 8770       | 11PNA3.65      | NA           |
| 7195       | KI-1           | A            | 7331       | Sh-0           | A            | 8787       | 11PNA3.86      | NA           |
| 7199       | KI-5           | A            | 7333       | Sei-0          | A            | 8791       | 11PNA3.90      | NA           |

The S-haplogroup assignment was based on Shimizu et al. (2008).

NA: not known.
